# Supplementary material
Source: PubMed Central journal article supplement (PMC7875091)
Supplement: NIHMS1669526-supplement-Supplementary_Table.pdf [file NIHMS1669526-supplement-Supplementary_Table.pdf]

**Table S1.** Relationship between luciferase substrate requirements and fluorophore photon production

| BRET Molecule Name | Luciferase Partner | Luciferase QY <sup>a</sup> | Substrate | Molecules Substrate Photon <sup>-1</sup> | Fluorophore Partner | Fluorophore QY | Excitation Photons Emission Photon <sup>-1</sup> | <sup>b</sup> Molecules Substrate Emission Photon <sup>-1</sup> | Reference                |
|--------------------|--------------------|----------------------------|-----------|------------------------------------------|---------------------|----------------|--------------------------------------------------|----------------------------------------------------------------|--------------------------|
| LumiFluor - CeNLuc | NLuc               | Unknown                    | FZ        | Unknown                                  | mCerulean3          | 0.87           | 1.15                                             | 3.38 <sup>c</sup>                                              |                          |
| LumiFluor - GpNLuc | NLuc               | Unknown                    | FZ        | Unknown                                  | eGFP                | 0.60           | 1.75                                             | 5.16 <sup>c</sup>                                              | (Schaub et al., 2015)    |
| N/A                | OLuc               | 0.34                       | CLZ       | 2.94                                     | N/A                 | N/A            | N/A                                              | N/A                                                            | (Shimomura et al., 1978) |
| eBAF-Y             | RLuc               | 0.02                       | CLZ       | 50                                       | Venus               | 0.57           | 1.75                                             | 87.72                                                          | (Saito et al., 2012)     |
| Nano-lantern       | RLuc8              | 0.05                       | CLZ       | 20                                       | Venus               | 0.57           | 1.75                                             | 35.09                                                          | (Saito et al., 2012)     |

Abbreviations: BRET, bioluminescence resonance energy transfer; QY, quantum yield; CLZ, coelenterazine; FZ, furimazine;

RLuc, Renilla; OLuc, Oplophorus; NLuc, NanoLuc

<sup>a</sup>Luciferase QY = number of photons emitted per luciferase molecule during a single catalytic cycle

<sup>b</sup>Molecules Substrate Emission Photon<sup>-1</sup> = (Excitation Photons Emission Photon<sup>-1</sup>) x (Molecules Substrate Photon<sup>-1</sup>)

<sup>c</sup>Calculated based on known QY of OLuc
